# Supplementary material for: Computational Identification of miRNAs and Their Target Genes from Expressed Sequence Tags of Tea (Camellia sinensis)
Source: PubMed Central journal article supplement — Genomics Proteomics Bioinformatics. 2010 Aug 4;8(2):113–21. doi: 10.1016/S1672-0229(10)60012-5 (PMC5054452; doi:10.1016/s1672-0229(10)60012-5), 2010-08-04
Supplement: mmc1.pdf [file mmc1.pdf]

## Supplementary Material

Prabu, G.R. and Mandal, A.K.A 2010. Computational identification of miRNAs and their target genes from expressed sequence tags of tea (*Camellia sinensis*). *Genomics Proteomics Bioinformatics* 8: 113-121.

DOI: 10.1016/S1672-0229(10)60012-5

Table S1



|          |            |            |   |        |     |                          |     |  |                                                                                   |     |
|----------|------------|------------|---|--------|-----|--------------------------|-----|--|-----------------------------------------------------------------------------------|-----|
| miR852*  | cs-miR852  | CV067043   | 0 | miRNA  | 21  | UCCUUGAUUCCGCCAAUAGAU    | 1   |  |                                                                                   |     |
|          |            |            |   | Target | 222 | AGGAACUAAGGCGGUUAUCUA    | 242 |  | Histone H2B related cluster                                                       | ORF |
| miR1134* | cs-miR1134 | CV014779   | 0 | miRNA  | 24  | UCGAAUAAGAAGAACAACAAC    | 1   |  |                                                                                   |     |
|          |            |            |   | Target | 34  | AGCUUAUUCUUCUUCUUGUUGUUG | 57  |  | 10 kDa chaperonin related cluster                                                 | 5'  |
|          | cs-miR1134 | AF399920   | 3 | miRNA  | 24  | GAAUAAGAAGAACAACAAC      | 3   |  |                                                                                   |     |
|          |            |            |   | Target | 89  | UUUAUUUUUGUUGUUGUUGUUG   | 110 |  | β-1,3-glucanase related cluster                                                   | ORF |
|          | cs-miR1134 | TA456_4442 | 3 | miRNA  | 24  | AUAAGAAGAACAACAAC        | 5   |  |                                                                                   |     |
|          |            |            |   | Target | 62  | CAUUCUUCUUCU-GUUGUUG     | 80  |  | Peptidase S10, serine carboxypeptidase                                            | 5'  |
| miR414** | cs-miR414  | CV013747   | 0 | miRNA  | 21  | CUACUACUACUACUACUACU     | 2   |  |                                                                                   |     |
|          |            |            |   | Target | 346 | GAUGAUGAUGAUGAUGAUGA     | 365 |  | Zinc finger protein-B box                                                         | 3'  |
|          | cs-miR414  | CV014663   | 0 | miRNA  | 21  | CUACUACUACUACUACUACU     | 2   |  |                                                                                   |     |
|          |            |            |   | Target | 206 | GAUGAUGAUGAUGAUGAUGA     | 225 |  | Putative CONSTANS related cluster                                                 | ORF |
|          | cs-miR414  | CV013892   | 1 | miRNA  | 21  | ACUACUACUACUACUGCUACU    | 1   |  |                                                                                   |     |
|          |            |            |   | Target | 156 | UGAUGAGGAUGAUGACGAUGA    | 176 |  | Nascent polypeptide-associated complex alpha subunit-like protein related cluster | ORF |
|          | cs-miR414  | AF537127   | 2 | miRNA  | 21  | CUACUACUACUACUACUACU     | 2   |  |                                                                                   |     |
|          |            |            |   | Target | 424 | UAUGAAGAUGAUGAUGAUGA     | 443 |  | Fructose biphosphate aldolase                                                     | 3'  |
|          | cs-miR414  | CV014190   | 2 | miRNA  | 21  | ACUACUACUACUACUACUACU    | 1   |  |                                                                                   |     |
|          |            |            |   | Target | 399 | UGGUGAUGGUGGUGGUGAUGA    | 419 |  | OSJNBa0079M09.8 protein related cluster                                           | 3'  |



|          |            |                       |     |        |     |                          |     |  |                                                  |     |
|----------|------------|-----------------------|-----|--------|-----|--------------------------|-----|--|--------------------------------------------------|-----|
|          | cs-miR414  | BQ825884              | 1   | miRNA  | 21  | CUACUACUACUACUGCUACU     | 2   |  |                                                  |     |
|          |            |                       |     | Target | 55  | GAUGACGAUGAUGACGAUGA     | 74  |  | No annotation available                          | 5'  |
|          | cs-miR414  | CV066958              | 2.5 | miRNA  | 21  | CUACUACUACUACUACUACU     | 2   |  |                                                  |     |
|          |            |                       |     | Target | 250 | GAUGACAGUGAUGAUGAUGA     | 269 |  | No annotation available                          | ORF |
| miR1864* | cs-miR1864 | CV014457              | 0   | miRNA  | 24  | UACCACUGGUACUGCAAUGACAGG | 1   |  |                                                  |     |
|          |            |                       |     | Target | 50  | AUGGUGACCAUGACGUUACUGUCC | 73  |  | Glucose acyltransferase related cluster          | 5'  |
| miR1886* | cs-miR1886 | CV067057 <sup>#</sup> | 0   | miRNA  | 23  | CUUACAAGUAUAGUGAAGAGAGU  | 1   |  |                                                  |     |
|          |            |                       |     | Target | 161 | GAAUGUUCAUAUCACUUCUCUCA  | 183 |  | OSJNBb0092G21.15 related cluster – Cyclin-P3-1   | ORF |
|          | cs-miR1886 | CV699717              | 3   | miRNA  | 23  | UUACAAGUAUAGUGAAGAGAGU   | 2   |  |                                                  |     |
|          |            |                       |     | Target | 29  | AAUGUUU-UAUCACUUUUCUCA   | 49  |  | Hypothetical protein (T32M21_60 related cluster) | 5'  |

\*Unique miRNA family registered in only one plant species in miRBase; \*\*Moderately conserved miRNA family registered in two plant species in miRBase; \*\*\*Highly conserved miRNA family registered in more than two plant species in miRBase. <sup>#</sup>EST target.

<sup>a</sup> Each top strand shows the miRNA sequence (3'-5'), and each bottom strand shows the corresponding complementary site within specific mRNA targets (5'-3'). Watson-Crick pairing (two vertical dots) and G:U wobble pairing (single dot) are indicated.

<sup>b</sup> Target site in mRNA. ORF, open reading frame; 5' and 3', untranslated region at 5' and 3' end of the mRNA, respectively.
